# Supplementary material for: Accumulation of Ambient Black Carbon Particles Within Key Memory-Related Brain Regions
Source: PubMed Central journal article supplement (PMC11004827; doi:10.1001/jamanetworkopen.2024.5678), 2024-04-09
Supplement: jamanetwopen-e245678-s001.pdf [file jamanetwopen-e245678-s001.pdf]

## Data Sharing Statement

Vanbrabant. Accumulation of Ambient Black Carbon Particles Within Key Memory-Related Brain Regions. *JAMA Netw Open*. Published April 09, 2024.

doi:10.1001/jamanetworkopen.2024.5678

### Data

**Data available:** Yes

**Data types:** Data (not involving human participants)

**How to access data:** Data will be made available upon reasonable request to the corresponding author ([kenneth.vanbrabant@uhasselt.be](mailto:kenneth.vanbrabant@uhasselt.be)).

**When available:** With publication

### Supporting Documents

**Document types:** None

### Additional Information

**Who can access the data:** anyone upon reasonable request

**Types of analyses:** For scientific purposes

**Mechanisms of data availability:** after approval of a proposal
